# Supplementary material for: Cell cycle networks link gene expression dysregulation, mutation, and brain maldevelopment in autistic toddlers
Source: PubMed Central journal article supplement (PMC4704485; doi:10.15252/msb.20156108), 2015-12-14
Supplement: MSB-11-841-s001.pdf [file MSB-11-841-s001.pdf]

## APPENDIX

### - TABLE OF CONTENT -

#### FIGURES

|                                                                                                                                  |        |
|----------------------------------------------------------------------------------------------------------------------------------|--------|
| <b>Appendix Figure S1.</b> WGCNA combined analysis across ASD and control toddlers                                               | pg. 2  |
| <b>Appendix Figure S2.</b> Module preservation analysis and quality scores                                                       | pg. 3  |
| <b>Appendix Figure S3.</b> Module preservation analysis between ASD and control datasets                                         | pg. 4  |
| <b>Appendix Figure S4.</b> Permutation analysis of the seven modules associated with TBV measures in the combined WGCNA analysis | pg. 5  |
| <b>Appendix Figure S5.</b> Permutation analysis of the top modules associated with TBV measures in ASD and Control groups        | pg. 6  |
| <b>Appendix Figure S6.</b> Association analysis between MEs and TBV measures using WGCNA on control toddlers                     | pg. 7  |
| <b>Appendix Figure S7.</b> Association analysis between MEs and TBV measures using WGCNA on ASD toddlers                         | pg. 8  |
| <b>Appendix Figure S8.</b> Boxplots and T-test analysis of Gene Significance                                                     | pg. 9  |
| <b>Appendix Figure S9.</b> Linear correlations for peripheral genes with high relevance to ASD brain measures                    | pg. 10 |
| <b>Appendix Figure S10.</b> Topological mapping of cell cycle hub-genes in a protein-protein interaction (PPI) network           | pg. 11 |

#### TABLES

|                                                                                                                                           |        |
|-------------------------------------------------------------------------------------------------------------------------------------------|--------|
| <b>Appendix Table S1.</b> Module preservation analysis between ASD and control datasets                                                   | pg. 12 |
| <b>Appendix Table S2.</b> Bootstrapped (10,000 resamples) 95% confidence intervals for correlation estimates in TD and ASD                | pg. 13 |
| <b>Appendix Table S3.</b> Linear regression analysis with age-correction and ANOVA testing                                                | pg. 13 |
| <b>Appendix Table S4.</b> Permutation analysis testing between-group difference (TD vs ASD) in correlation strength (10,000 permutations) | pg. 14 |
| <b>Appendix Table S5.</b> Module preservation analysis between blood and BrainSpan datasets                                               | pg. 14 |
| <b>Appendix Table S6.</b> Permutation analyses testing between-group difference (TD vs ASD) in correlation strength (10,000 permutations) | pg. 15 |
| <b>Appendix Table S7.</b> CHD8 subnetwork linear regression analysis with age-correction and ANOVA testing                                | pg. 15 |

## APPENDIX FIGURES

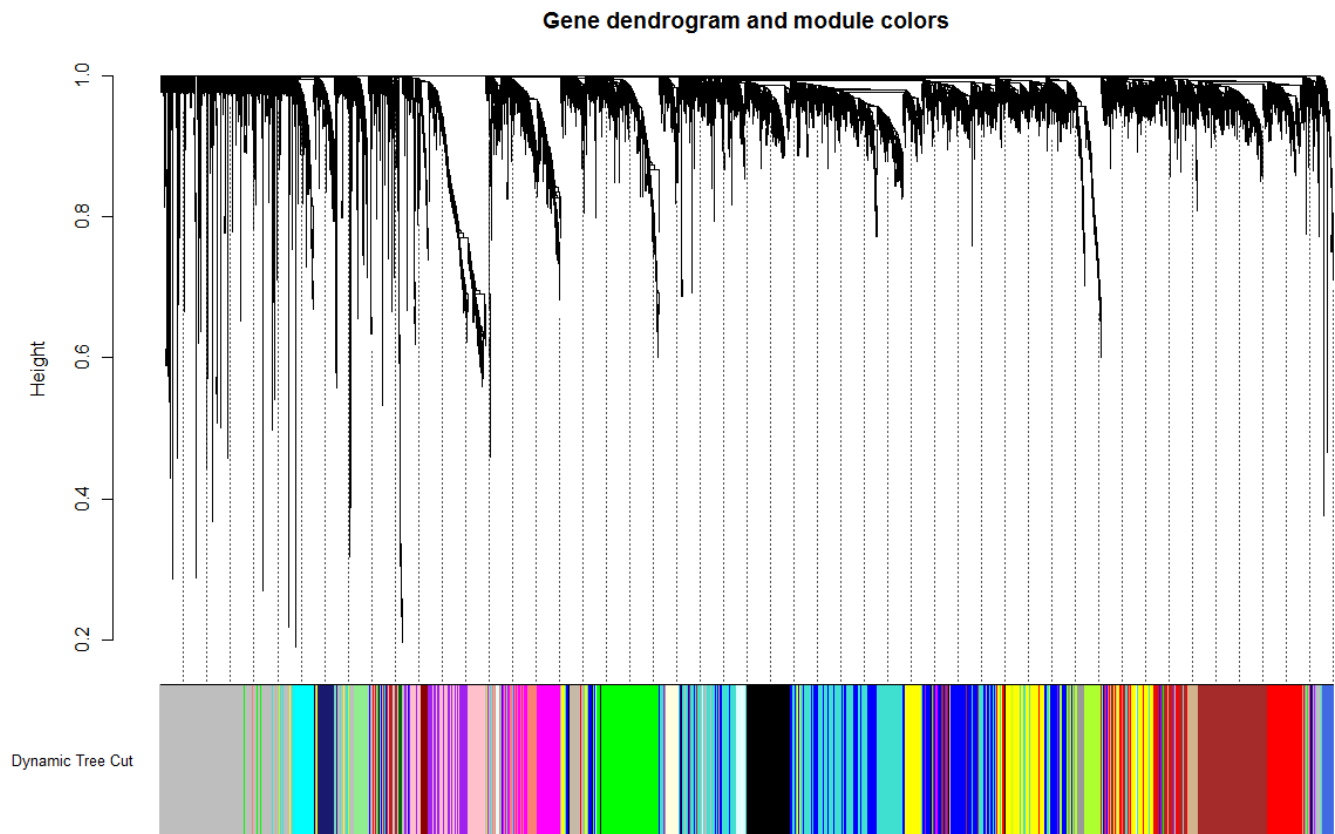

**Appendix Figure S1. WGCNA combined analysis across ASD and control toddlers.** Co-expression modules are generated and color-coded. Each vertical line corresponds to a gene, and genes with similar expression are clustered into modules. Modules are herein called by the assigned WGCNA default colors. Module eigengenes are computed for each subject and each module.

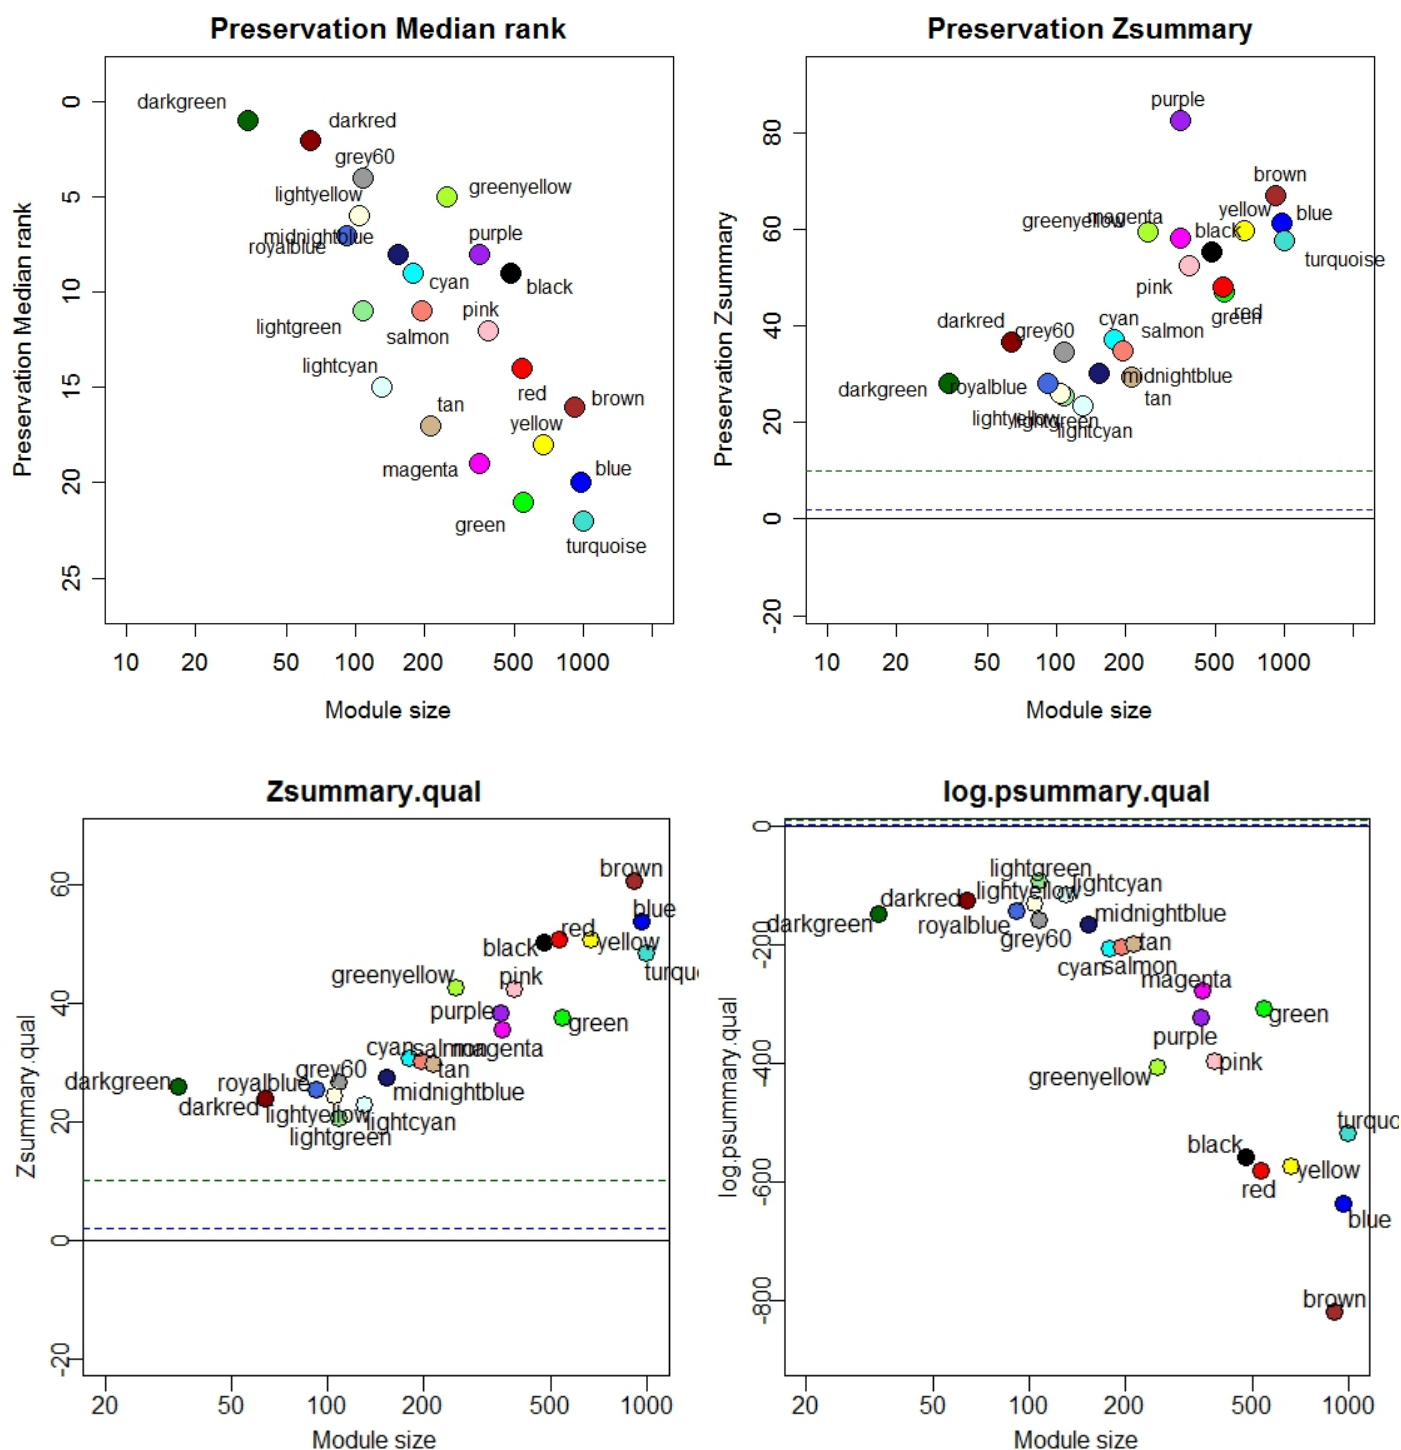

**Appendix Figure S2. Module preservation analysis and quality scores.** Zsummary statistic (e.g., Zsummary > 10 means highly preserved, Zsummary in between 2 and 10 is weak to moderate preservation, Zsummary < 2 is little to no preservation and median rank (modules with lowest rank are highly preserved). Median Rank and Zsummary values indicate high module preservation between the combined ASD + control dataset and itself. Zsummary.qual and related log.p.qual statistics show that module preservation is of high quality and statistically significant against random chance.

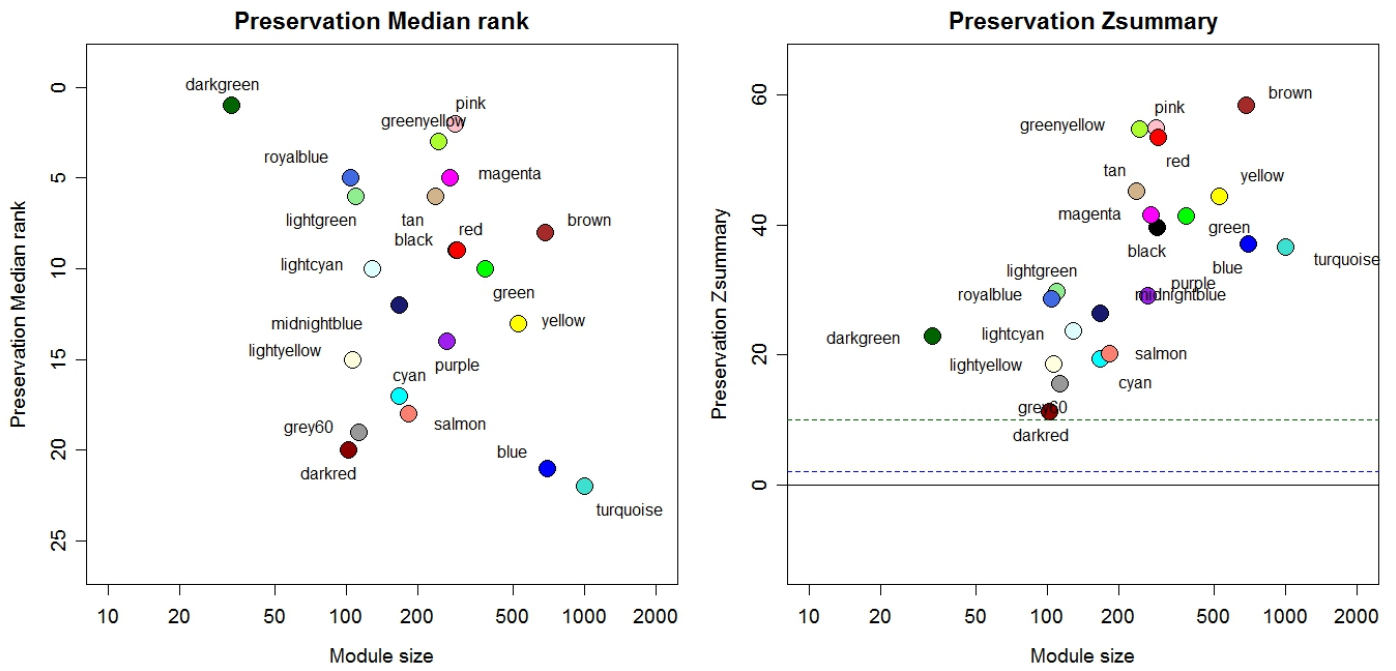

**Appendix Figure S3. Module preservation analysis between ASD and control datasets.** Zsummary statistic (e.g., Zsummary > 10 means highly preserved, Zsummary in between 2 and 10 is weak to moderate preservation, Zsummary < 2 is little to no preservation and median rank (modules with lowest rank are highly preserved). Median Rank and Zsummary values indicate high module preservation between ASD and control datasets.

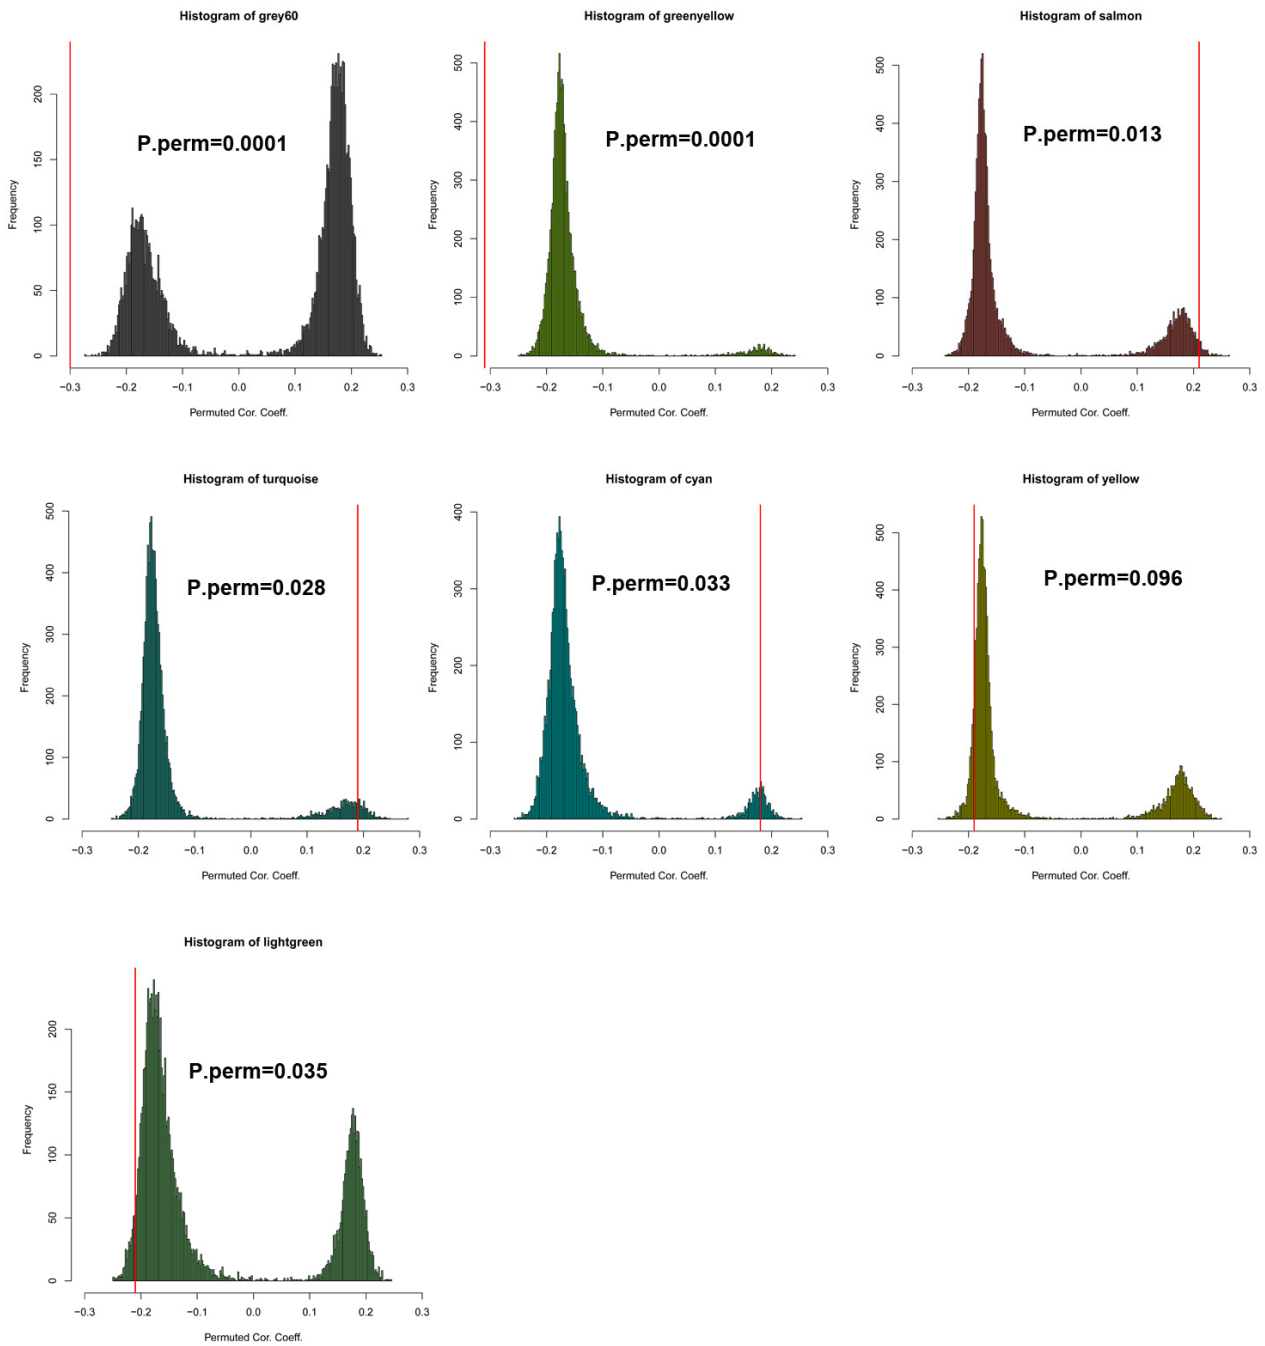

**Appendix Figure S4. Permutation analysis of the seven modules associated with TBV measures in the combined WGCNA analysis.** Distributions of 10000 correlation tests between randomly generated ME values and TBV measures across all subjects. All modules but yellow displayed significant association with TBV against chance.

## Modules associated with control brain size

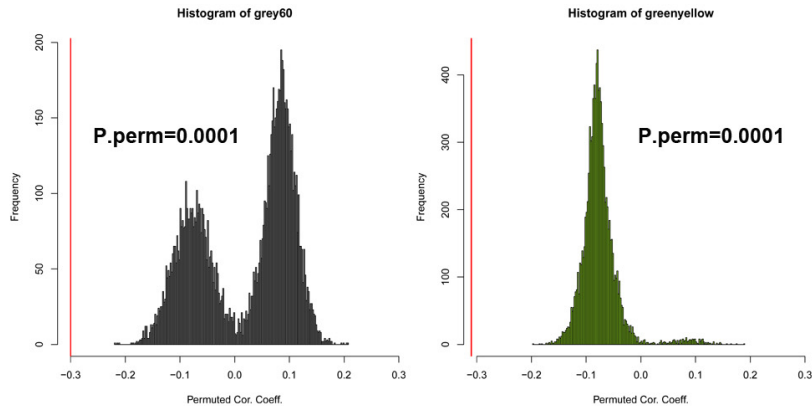

## Modules associated with ASD brain size

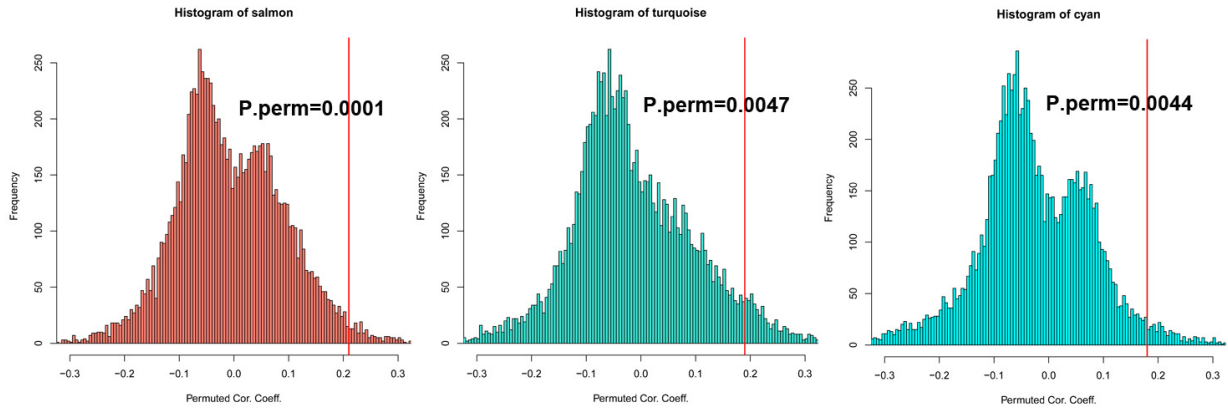

**Appendix Figure S5. Permutation analysis of the top modules associated with TBV measures in ASD and Control groups.** Distributions of 10000 correlation tests between randomly generated ME values and TBV measures in each group separately. All modules displayed significant association with TBV against chance.

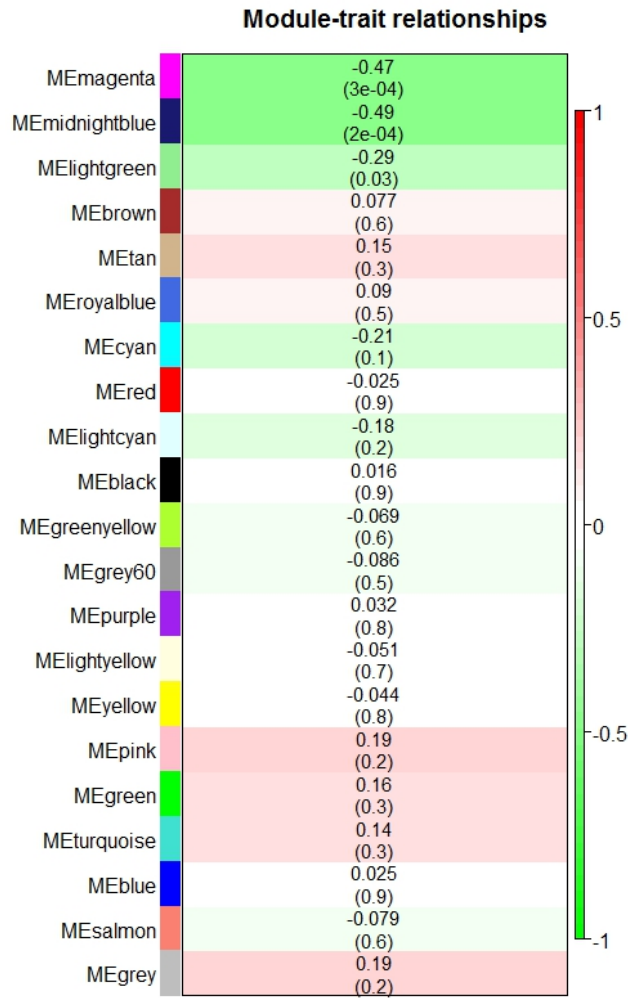

**Appendix Figure S6. Association analysis between MEs and TBV measures using WGCNA on control toddlers.** Two modules, enriched in cell cycle and protein folding genes were associated with TBV measures in control toddlers (see magenta and midnightblue respectively; see also File E1). Module grey contains genes that were left out from the co-expression analysis.

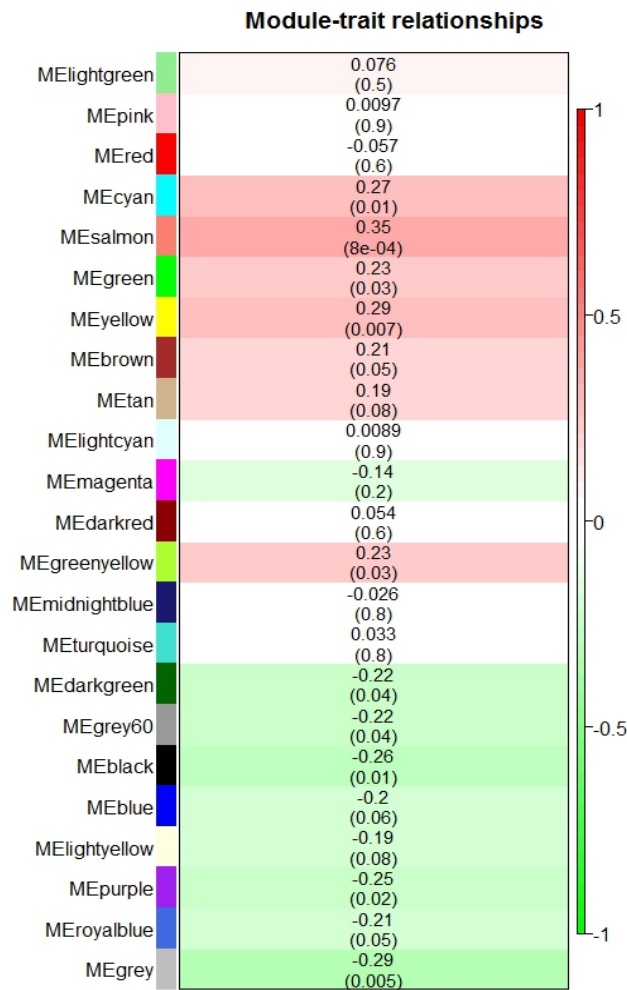

**Appendix Figure S7. Association analysis between MEs and TBV measures using WGCNA on ASD toddlers.** While nine different modules displayed modest association ( $r > 0.2$ ,  $P < 0.05$ ) with TBV in ASD, the strongest association (salmon,  $r = 0.35$ ) was again with the module enriched in cell adhesion genes (see also File E1). Module grey contains genes that were left out from the co-expression analysis.



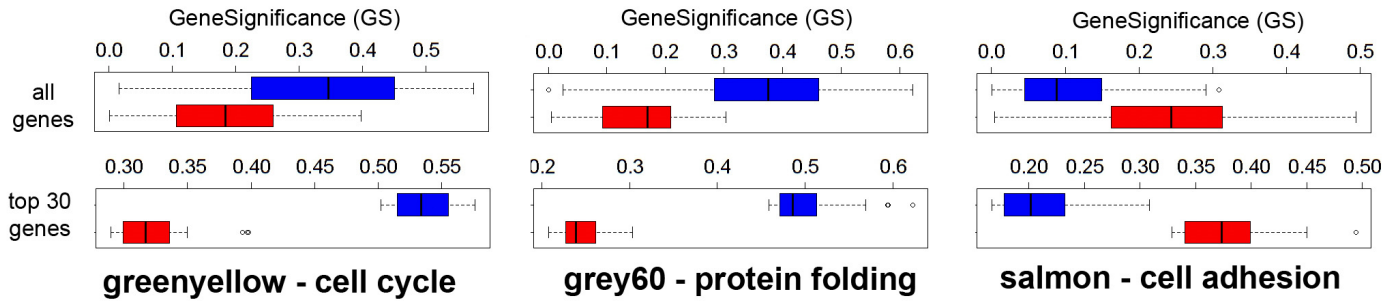

| Module      | Analysis     | t-value  | Df  | P-value |
|-------------|--------------|----------|-----|---------|
| greenyellow | All genes    | 14.9177  | 506 | 2.2e-16 |
| greenyellow | Top 30 genes | 31.3059  | 58  | 2.2e-16 |
| grey60      | All genes    | 13.9923  | 224 | 2.2e-16 |
| grey60      | Top 30 genes | 27.8284  | 58  | 2.2e-16 |
| salmon      | All genes    | -14.7129 | 306 | 2.2e-16 |
| salmon      | Top 30 genes | -15.4298 | 58  | 2.2e-16 |

**Appendix Figure S8. Boxplots and T-test analysis of Gene Significance.** Gene significance scores display significantly different distributions between ASD (red) and control (blue) toddlers.

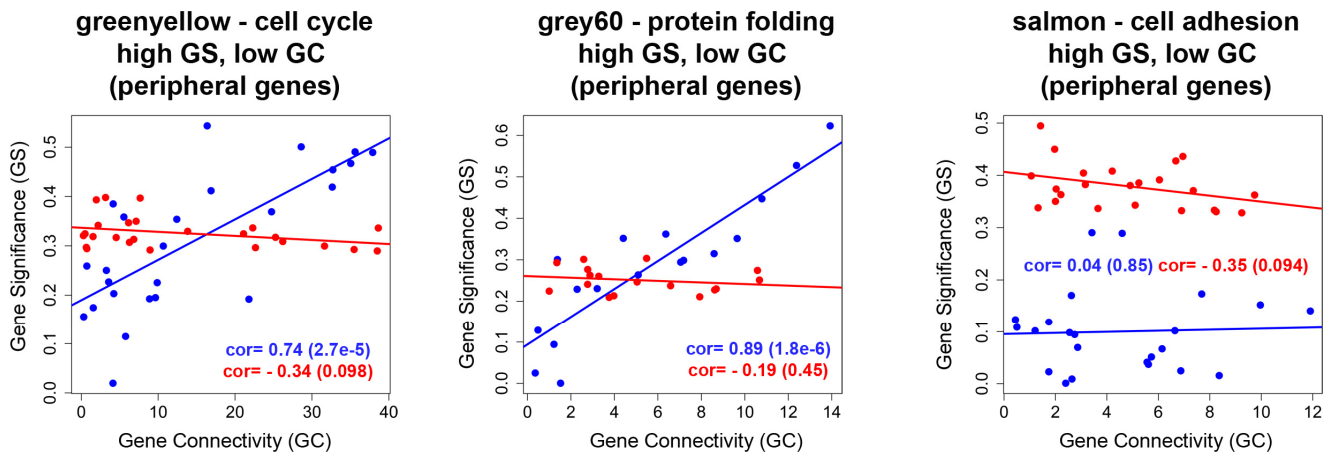

**Appendix Figure S9. Linear correlations for peripheral genes with high relevance to ASD brain measures.** Scatterplots displaying correlations between GS and GC in both ASD and control toddlers. The genes selected in these plots are those that had the top 30 highest GS scores in ASD, but which were not within the top 30 in GC scores, and are thus considered ‘peripheral’ in the co-expression networks.

# CELL CYCLE PPI NETWORK

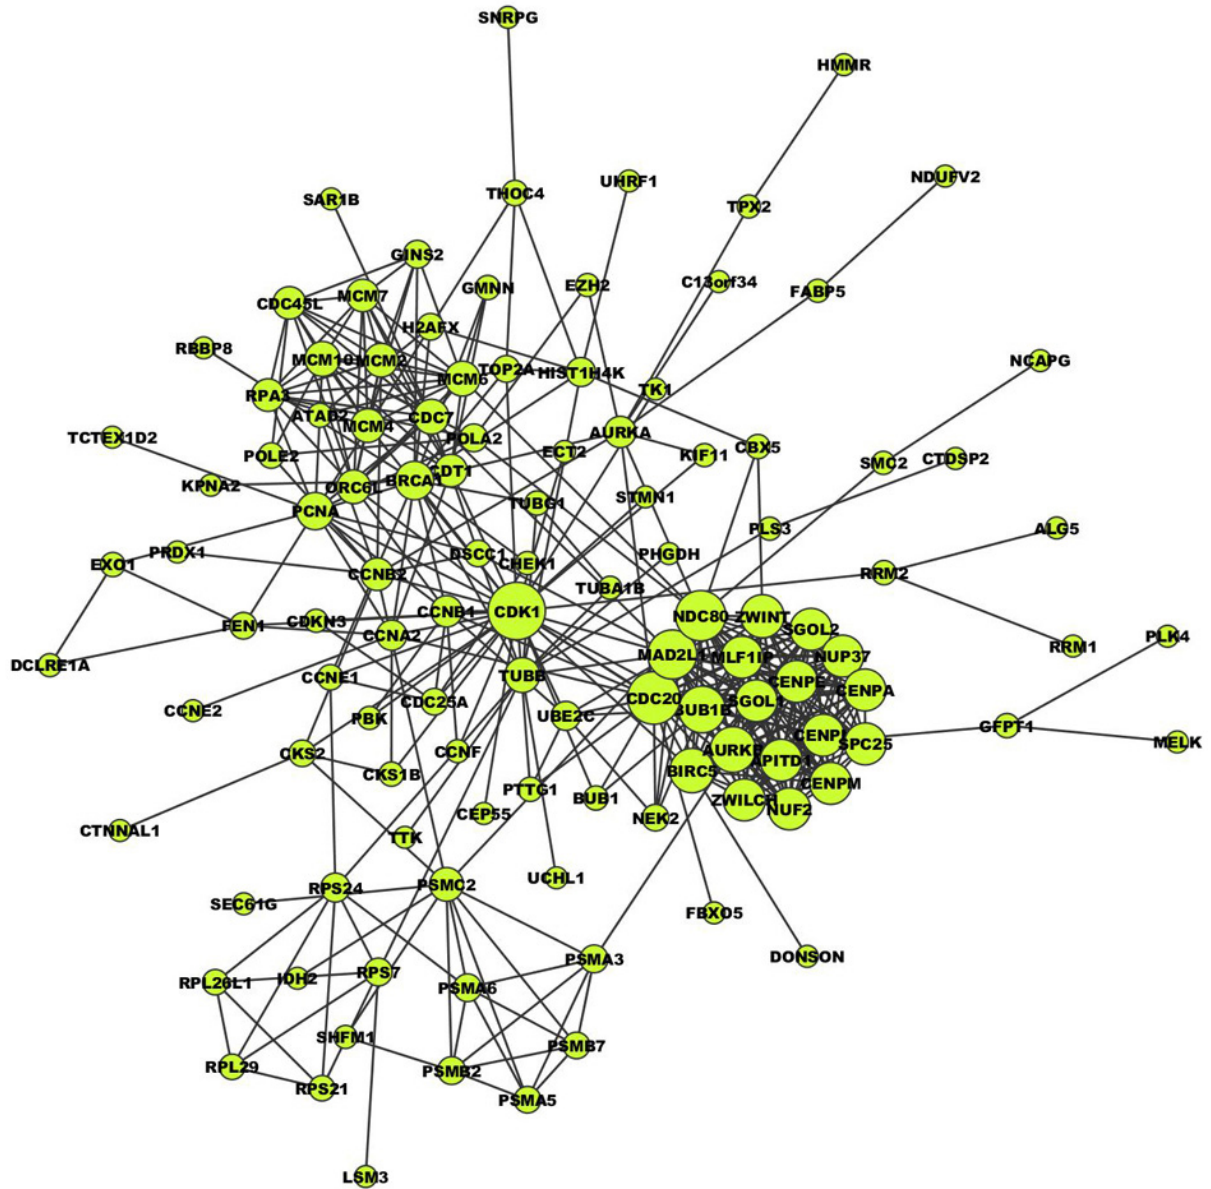

Appendix Figure S10. Topological mapping of cell cycle hub-genes in a protein-protein interaction (PPI) network. A) Reference PPI network for cell cycle genes (GreenYellow module/color). Node (circle) size is proportional to the number of actual biologically driven PPIs (not to the hub-gene connectivity scores based on co-expression used in the top 30 ranking).

## **APPENDIX TABLES**

**Appendix Table S1.** Module preservation analysis between ASD and control datasets

| <b>Module</b> | <b>medianRank.pres</b> | <b>medianRank.qual</b> | <b>Zsummary.pres</b> | <b>Zsummary.qual</b> |
|---------------|------------------------|------------------------|----------------------|----------------------|
| brown         | 8                      | 20                     | 58                   | 44                   |
| greenyellow   | 3                      | 8.5                    | 55                   | 38                   |
| pink          | 2                      | 16.5                   | 55                   | 32                   |
| red           | 9                      | 3.5                    | 54                   | 45                   |
| tan           | 6                      | 6                      | 45                   | 37                   |
| yellow        | 13                     | 16.5                   | 44                   | 43                   |
| magenta       | 5                      | 10.5                   | 42                   | 40                   |
| green         | 10                     | 13                     | 41                   | 44                   |
| black         | 9                      | 10                     | 40                   | 41                   |
| blue          | 21                     | 22                     | 37                   | 44                   |
| turquoise     | 22                     | 18                     | 37                   | 60                   |
| lightgreen    | 6                      | 11.5                   | 30                   | 24                   |
| purple        | 14                     | 6                      | 29                   | 41                   |
| royalblue     | 5                      | 2                      | 29                   | 26                   |
| grey          | 24                     | 24                     | 27                   | -19                  |
| midnightblue  | 12                     | 15                     | 26                   | 27                   |
| lightcyan     | 10                     | 6                      | 24                   | 27                   |
| darkgreen     | 1                      | 1                      | 23                   | 23                   |
| salmon        | 18                     | 9                      | 20                   | 32                   |
| cyan          | 17                     | 20                     | 19                   | 27                   |
| lightyellow   | 15                     | 20                     | 19                   | 18                   |
| gold          | 23                     | 23                     | 16                   | 1.6                  |
| grey60        | 19                     | 14                     | 16                   | 22                   |
| darkred       | 20                     | 3.5                    | 11                   | 26                   |

**Appendix Table S2.** Bootstrapped (10,000 resamples) 95% confidence intervals for correlation estimates in TD and ASD

| Module      | TD          |             | ASD         |             |
|-------------|-------------|-------------|-------------|-------------|
|             | Lower bound | Upper bound | Lower bound | Upper bound |
| cyan        | -0.2494     | 0.3006      | 0.0411      | 0.4810      |
| greenyellow | -0.6591     | -0.2089     | -0.4892     | 0.0437      |
| grey60      | -0.6912     | -0.2352     | -0.4065     | 0.0161      |
| lightgreen  | -0.6125     | 0.0952      | -0.4106     | 0.1075      |
| salmon      | -0.6012     | 0.0308      | -0.2074     | 0.2798      |
| turquoise   | -0.2852     | 0.4334      | 0.0713      | 0.5124      |
| yellow      | -0.4689     | 0.2483      | -0.4330     | -0.0261     |

**Appendix Table S3.** Linear regression analysis with age-correction and ANOVA testing

| RESIDUALS CALCULATED FROM CONTROL MEASURES |                           |                   |                      |                         |
|--------------------------------------------|---------------------------|-------------------|----------------------|-------------------------|
| Module                                     | Pearson cor               | Linear model 1    | Linear model 2       | Model comparison        |
| Control                                    | pValue, cor.test(TBV~age) | Rsqr, lm(TBV~age) | Rsqr, lm(TBV~ME+age) | pValue, anova(lm1, lm2) |
| GreenYellow                                | 0.852                     | 0.001             | 0.258                | 0.001**                 |
| Grey60                                     | 0.852                     | 0.001             | 0.259                | 0.001**                 |
| Salmon                                     | 0.852                     | 0.001             | 0.009                | 0.593                   |
| Cyan                                       | 0.852                     | 0.001             | 0.003                | 0.797                   |
| Turquoise                                  | 0.852                     | 0.001             | 0.005                | 0.724                   |
| Yellow                                     | 0.852                     | 0.001             | 0.018                | 0.436                   |
| ASD                                        | pValue, cor.test(TBV~age) | Rsqr, lm(TBV~age) | Rsqr, lm(TBV~ME+age) | pValue, anova(lm1, lm2) |
| GreenYellow                                | 0.004**                   | 0.124             | 0.142                | 0.261                   |
| Grey60                                     | 0.004**                   | 0.124             | 0.136                | 0.357                   |
| Salmon                                     | 0.004**                   | 0.124             | 0.217                | 0.008**                 |
| Cyan                                       | 0.004**                   | 0.124             | 0.179                | 0.046*                  |
| Turquoise                                  | 0.004**                   | 0.124             | 0.157                | 0.122                   |
| Yellow                                     | 0.004**                   | 0.124             | 0.153                | 0.149                   |

**Appendix Table S4.** Permutation analysis testing between-group difference (TD vs ASD) in correlation strength (10,000 permutations).

| Module      | rTD          | rASD         | zDiff_real   | pValue      |
|-------------|--------------|--------------|--------------|-------------|
| greenyellow | -0.440018973 | -0.238972702 | -0.228570023 | 0.177082292 |
| grey60      | -0.472288151 | -0.204066705 | -0.306038998 | 0.067693231 |
| salmon      | -0.080861822 | 0.348149398  | -0.444375118 | 0.01059894  |
| cyan        | 0.037118013  | 0.267513857  | -0.237049048 | 0.116888311 |
| turquoise   | 0.066477979  | 0.29185534   | -0.23401699  | 0.142385761 |
| yellow      | -0.12174427  | -0.237685929 | 0.119968885  | 0.277072293 |
| lightgreen  | -0.284887484 | -0.177027937 | -0.114080474 | 0.318468153 |

**Appendix Table S5.** Module preservation analysis between blood and BrainSpan datasets.

| moduleColors | medianRank.pres | medianRank.qual | Zsummary.pres | Zsummary.qual |
|--------------|-----------------|-----------------|---------------|---------------|
| greenyellow  | 1               | 2               | 14            | 35            |
| brown        | 6               | 14.5            | 12            | 51            |
| turquoise    | 13              | 20              | 9.8           | 52            |
| blue         | 11              | 18              | 8.5           | 49            |
| tan          | 3               | 16              | 7.4           | 22            |
| red          | 6               | 11.5            | 6.9           | 39            |
| green        | 8               | 20.5            | 5.2           | 33            |
| gold         | 17              | 23              | 5.1           | 0.063         |
| grey         | 19              | 24              | 4.5           | -25           |
| pink         | 8               | 22              | 3.1           | 9.8           |
| salmon       | 13              | 6.5             | 2.6           | 26            |
| lightgreen   | 17              | 6               | 1.6           | 19            |
| royalblue    | 11              | 5               | 1.4           | 22            |
| black        | 15              | 10              | 1.3           | 36            |
| cyan         | 16              | 9               | 1.3           | 21            |
| magenta      | 19              | 18              | 0.67          | 24            |
| yellow       | 21              | 13.5            | 0.5           | 44            |
| darkred      | 9               | 1               | 0.45          | 9.5           |
| lightyellow  | 16              | 7.5             | 0.36          | 16            |
| purple       | 19              | 12              | 0.24          | 25            |
| grey60       | 22              | 3               | 0.076         | 20            |
| midnightblue | 14              | 16.5            | -0.16         | 17            |
| lightcyan    | 18              | 12              | -0.36         | 19            |
| darkgreen    | 5               | 11.5            | -0.41         | 2.4           |

**Appendix Table S6.** Permutation analyses testing between-group difference (TD vs ASD) in correlation strength (10,000 permutations).

| <b>Subnetwork</b> | <b>Control cor. (pval)</b> | <b>ASD cor. (pval)</b> | <b>Zdiff</b> | <b>Perm. Pval</b> |
|-------------------|----------------------------|------------------------|--------------|-------------------|
| CHD8              | -0.41(0.009)               | -0.075(0.55)           | 0.3655       | 0.0353            |
| APH1A             | 0.21(0.19)                 | 0.24(0.049)            | 0.0325       | 0.4413            |
| NR3C2             | 0.33(0.045)                | 0.028(0.82)            | -0.3112      | 0.0897            |

**Appendix Table S7.** CHD8 subnetwork linear regression analysis with age-correction and ANOVA testing

| <b>CHD8</b> | <b>Linear model 1</b>   | <b>Linear model 2</b>      | <b>Model comparison</b>        |
|-------------|-------------------------|----------------------------|--------------------------------|
|             | <b>Rsq, lm(TBV~age)</b> | <b>Rsq, lm(TBV~ME+age)</b> | <b>pValue, anova(lm1, lm2)</b> |
| ASD         | 0.1239                  | 0.1272                     | 0.6282                         |
| Control     | 0.000975                | 0.2297                     | 0.002737**                     |
