# Supplementary material for: Cell cycle networks link gene expression dysregulation, mutation, and brain maldevelopment in autistic toddlers
Source: PubMed Central journal article supplement (PMC4704485; doi:10.15252/msb.20156108), 2015-12-14
Supplement: MSB-11-841-s002.pdf [file MSB-11-841-s002.pdf]

## Expanded View Figures

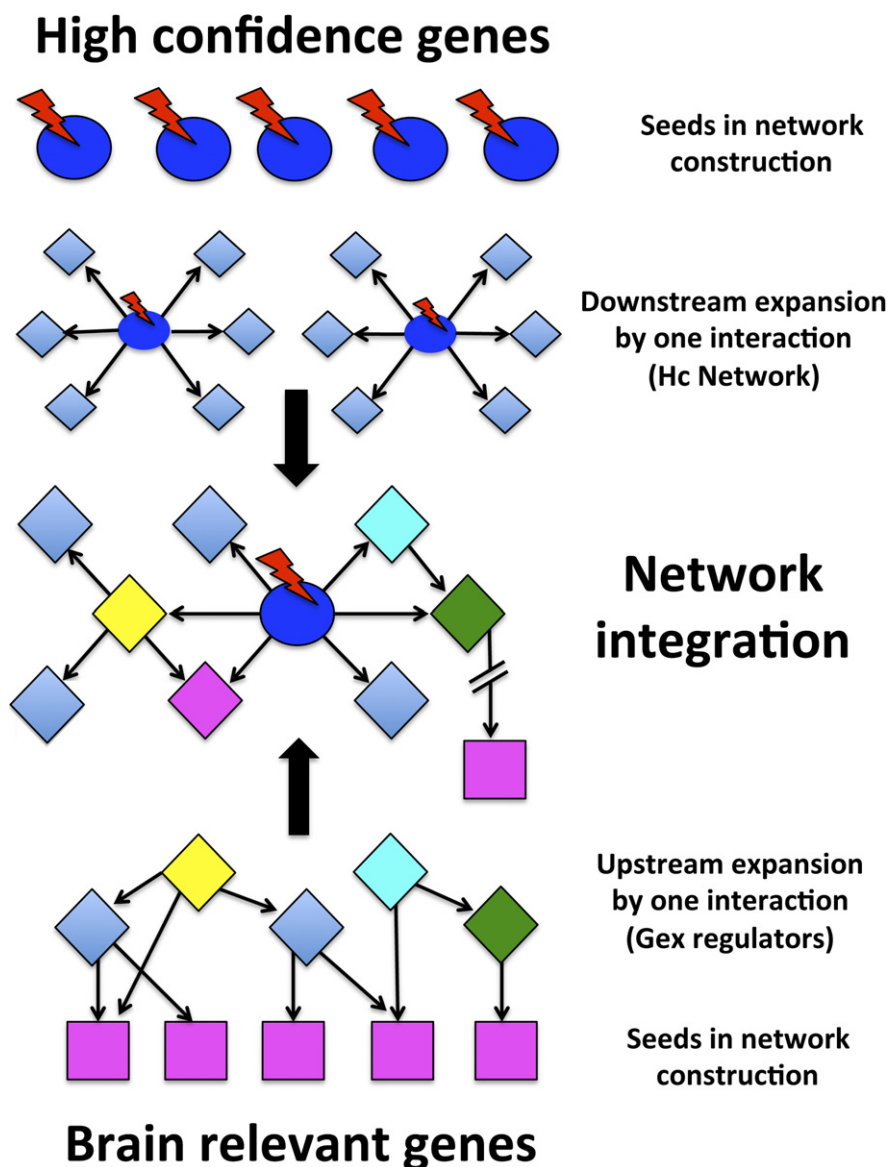

**Figure EV1. Schematic of the approach used to generate the High-confidence (Hc) network.** Thirty-two (32) Hc genes (blue circles) were mapped onto Metacore GeneGo to construct a Hc network. Each Hc gene was used as node to identify direct downstream targets (diamond shapes). Red lightning bolts represent the possible presence of mutations affecting the Hc genes. Similarly, twenty-three (23) brain-relevant genes (purple squares) were used in Metacore to look for direct upstream regulatory genes (yellow, cyan, green diamond shapes). Downstream and upstream targets were integrated into a final Hc network.
